# Supplementary material for: Smart CO2 Capture and Release and an Insight into Biological Evolution Based on Its Characteristics
Source: Research Square preprint supplement (doi:10.21203/rs.3.rs-7146570/v1), 2025-09-09
Supplement: Supplementary file 1 [file 079bc35e01b5d97816381a59.pdf]

Supplementary Fig. 1, Table 1 and Fig. 2

### Supplementary Figure 1.

“Pseudo-Osmosis” in the gas phase.

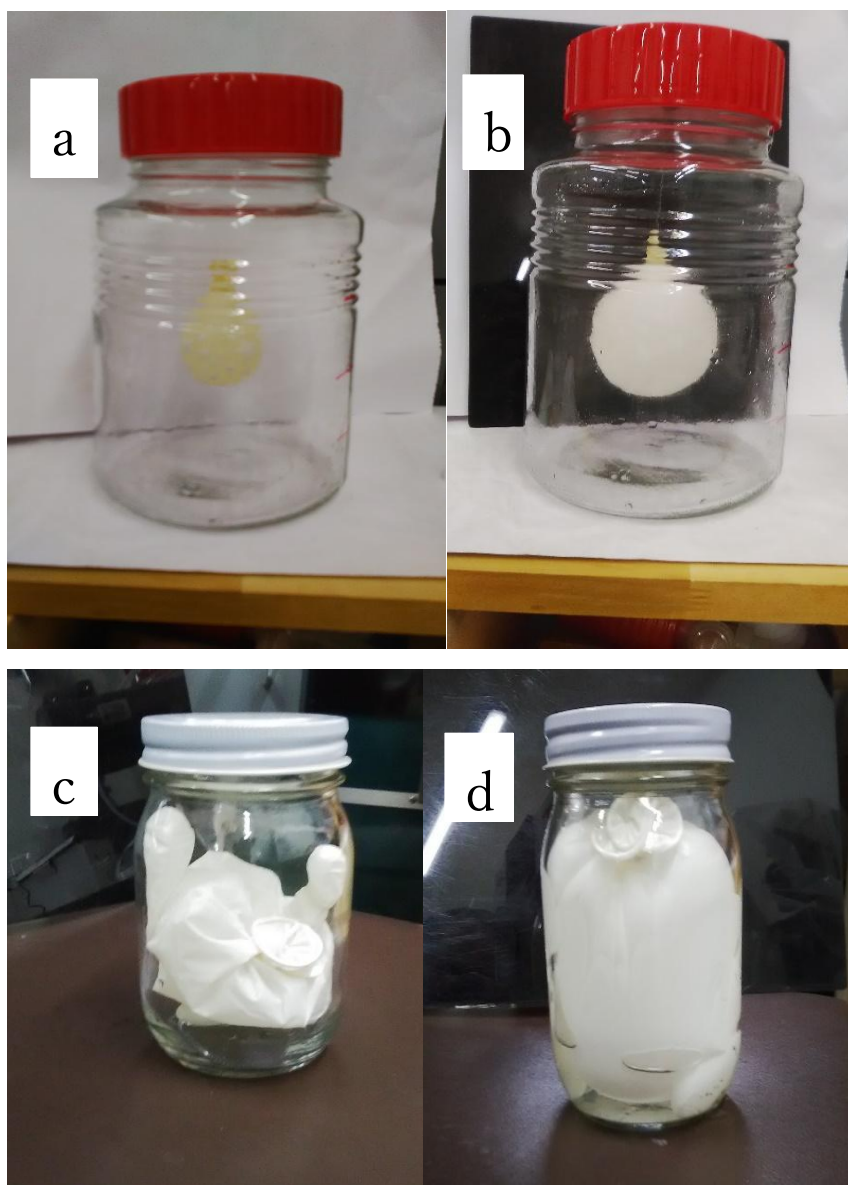

(a) The initial state of latex balloon, (b) the ballon treated with 80% CO<sub>2</sub> in 4 L glass bottle for 4h, (c) the initial state of a latex glove, and (d) the glove treated with 100% CO<sub>2</sub> in 450 mL glass bottle for 4 h.

## Supplementary Table I.

Solubility of gas into the water.

| Gas             | 0°C    | 20°C   | 40°C  | 60°C  | 80°C   | 100°C  |
|-----------------|--------|--------|-------|-------|--------|--------|
| CO <sub>2</sub> | 1.71   | 0.88   | 0.53  | 0.36  |        |        |
|                 | 1.71   | 0.869  |       |       |        |        |
| O <sub>2</sub>  | 0.049  | 0.031  | 0.023 | 0.019 | 0.018  |        |
|                 | 0.049  | 0.0312 |       |       |        |        |
| N <sub>2</sub>  | 0.024  | 0.016  | 0.012 | 0.01  | 0.0096 | 0.0095 |
|                 | 0.0238 | 0.0159 |       |       |        |        |
| Air             | 0.029  | 0.019  | 0.014 | 0.012 | 0.011  | 0.011  |
| H <sub>2</sub>  | 0.0219 | 0.0181 |       |       |        |        |
| CH <sub>4</sub> |        | 0.0347 |       |       |        |        |

The value means the volume of the gas which absorbs into 1 mL water at 1 atm.

The black value is a citation from the Chronological Scientific Table, Maruzen Publication Company. The red value is a citation from the Handbook of Chemistry, 3.5 edition.

Supplementary Figure 2

An “Artificial Forest” Model.

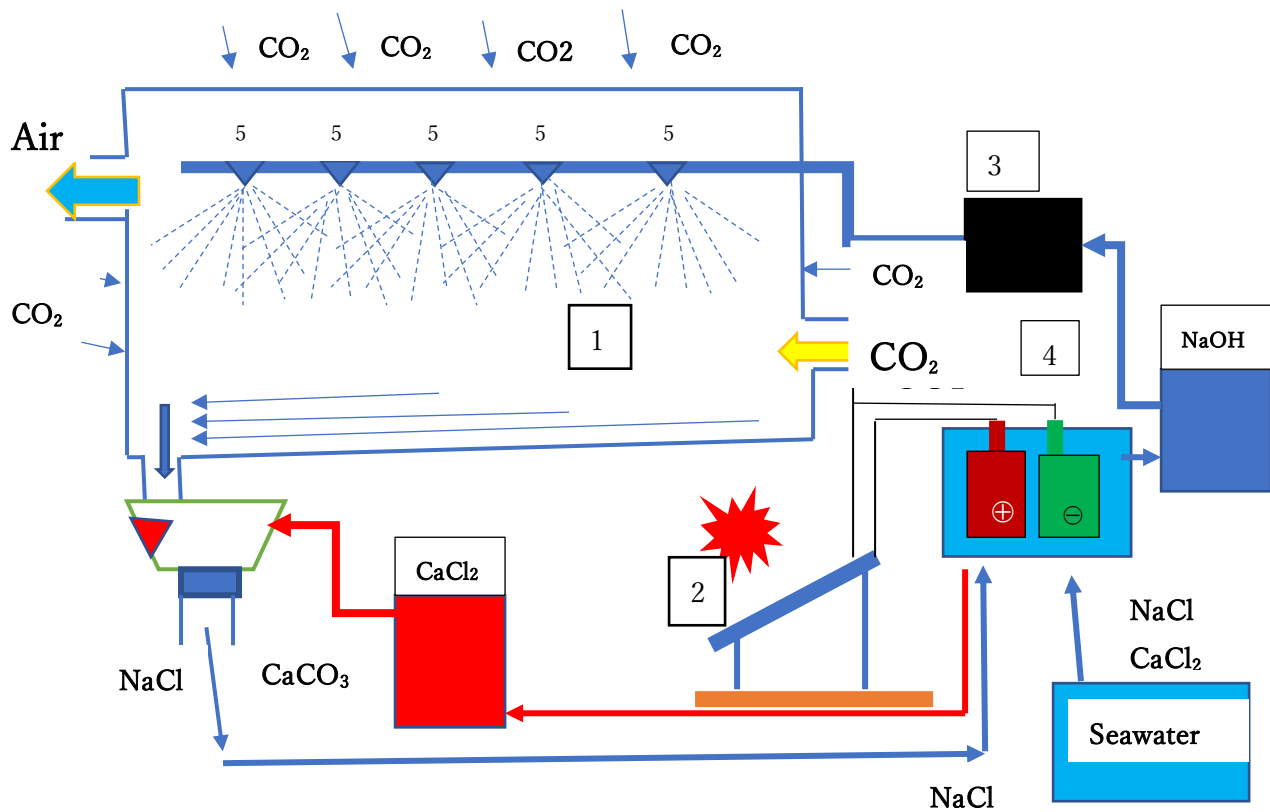

1):  $\text{CO}_2$  fixing space, 2): solar panel, 3) pump, 4): battery.

Using a polytunnel made of polymer sheets, which allows  $\text{CO}_2$  penetration, instead of hard chamber, steel, or plastic could be cost effective.
